# Supplementary material for: Whole-Genome Sequencing-Based Screening of MRSA in Patients and Healthcare Workers in Public Hospitals in Benin
Source: MDPI journal article supplement (doi:10.3390/microorganisms11081954), 2023-07-31
Supplement: s1 [file s1]

## Supplementary Material

### Tables

**Table S1: Mammalian reference genomes included in the Kraken 2 database**

| Species                        | RefSeq accession |
|--------------------------------|------------------|
| <i>Aedes aegypti</i>           | GCF_002204515    |
| <i>Aedes albopictus</i>        | GCF_006496715    |
| <i>Anas platyrhynchos</i>      | GCF_015476345    |
| <i>and Stomoxys calcitrans</i> | GCF_001015335    |
| <i>Apis mellifera</i>          | GCF_003254395    |
| <i>Bos taurus</i>              | GCF_002263795    |
| <i>Capra hircus</i>            | GCF_001704415    |
| <i>Cavia porcellus</i>         | GCF_000151735    |
| <i>Chlorocebus sabaeus</i>     | GCF_015252025    |
| <i>Columba livia</i>           | GCF_000337935    |
| <i>Culex quinquefasciatus</i>  | GCF_015732765    |
| <i>Equus caballus</i>          | GCF_002863925    |
| <i>Gallus gallus</i>           | GCF_000002315    |
| <i>Homo sapiens</i>            | GCF_000001405    |
| <i>Ixodes scapularis</i>       | GCF_002892825    |
| <i>Meleagris gallopavo</i>     | GCF_000146605    |
| <i>Mesocricetus auratus</i>    | GCF_000349665    |
| <i>Mus musculus</i>            | GCF_000001635    |
| <i>Numida meleagris</i>        | GCF_002078875    |
| <i>Ovis aries</i>              | GCF_002742125    |
| <i>Rattus norvegicus</i>       | GCF_015227675    |
| <i>Sus scrofa</i>              | GCF_000003025    |

This table lists the reference genomes included in the in-house Kraken 2 database. The first column lists the species. The second column lists the RefSeq accession number.

**Table S2: Overview of the generated WGS datasets**

| Isolate | Run | QC status    | SRA accession |
|---------|-----|--------------|---------------|
| 32      | B   | Low depth    | SRR23547053   |
| 32      | C   | OK           | SRR23547083   |
| 562     | B   | Low depth    | SRR23547099   |
| 562     | C   | OK           | SRR23547078   |
| 680     | B   | Contaminated | SRR23547095   |
| 680     | C   | OK           | SRR23547075   |
| 905     | B   | OK           | SRR23547093   |
| 905     | C   | OK           | SRR23547073   |
| 907     | B   | Low depth    | SRR23547091   |
| 907     | C   | OK           | SRR23547072   |
| 961     | A   | Contaminated | SRR23547104   |
| 961     | B   | Low depth    | SRR23547090   |
| 961     | C   | OK           | SRR23547071   |
| 994     | F   | OK           | SRR23547058   |
| 995     | F   | OK           | SRR23547057   |
| 996     | F   | OK           | SRR23547056   |
| 998     | E   | OK           | SRR23547066   |
| 1002    | F   | OK           | SRR23547065   |
| 1043    | D   | OK           | SRR23547069   |
| 1052    | F   | OK           | SRR23547064   |
| 1053    | F   | OK           | SRR23547063   |
| 1057    | F   | OK           | SRR23547062   |
| 1398    | E   | Contaminated | SRR23547067   |
| 1401    | F   | OK           | SRR23547061   |
| 1405    | F   | OK           | SRR23547060   |
| 1684    | B   | Low depth    | SRR23547103   |
| 1684    | C   | OK           | SRR23547089   |
| 1701    | B   | Contaminated | SRR23547092   |
| 1701    | C   | Fragmented   | SRR23547088   |
| 2007    | B   | Contaminated | SRR23547081   |
| 2007    | C   | OK           | SRR23547087   |
| 2090    | B   | Contaminated | SRR23547070   |
| 2090    | C   | OK           | SRR23547086   |
| 2656    | B   | Low depth    | SRR23547059   |
| 2656    | C   | OK           | SRR23547085   |
| 2777    | B   | Low depth    | SRR23547055   |
| 2777    | C   | OK           | SRR23547084   |
| 2855    | B   | Contaminated | SRR23547054   |
| 3247    | B   | Fragmented   | SRR23547052   |
| 3247    | C   | OK           | SRR23547082   |
| 3326    | B   | OK           | SRR23547102   |
| 3326    | C   | Contaminated | SRR23547080   |
| 4101    | B   | OK           | SRR23547101   |
| 4101    | C   | OK           | SRR23547079   |
| 5232    | B   | Low depth    | SRR23547100   |
| 5232    | D   | OK           | SRR23547068   |
| 5729    | B   | OK           | SRR23547098   |

|      |   |              |             |
|------|---|--------------|-------------|
| 5729 | C | OK           | SRR23547077 |
| 6020 | B | Contaminated | SRR23547097 |
| 6512 | B | Low depth    | SRR23547096 |
| 6512 | C | Low depth    | SRR23547076 |
| 7111 | B | Low depth    | SRR23547094 |
| 7111 | C | OK           | SRR23547074 |

The first and second columns list the isolate and run names, respectively. The third column indicates if the dataset passed the quality checks described in the Material & Methods. Note that the quality checks are evaluated sequentially (e.g., a dataset that is labeled as ‘Contaminated’ could also have low depth and/or a fragmented assembly). The last column lists the SRA accession number.

**Table S3: Overview of the sequenced datasets and the selected high-quality dataset per isolate**

| isolate | Run A        | Run B         | Run C        | Run D | Run E        | Run F |
|---------|--------------|---------------|--------------|-------|--------------|-------|
| 32      | -            | low depth     | OK           | -     | -            | -     |
| 562     | -            | low depth     | OK           | -     | -            | -     |
| 680     | -            | contaminated  | contaminated | -     | -            | -     |
| 905     | -            | OK (not used) | OK           | -     | -            | -     |
| 907     | -            | low depth     | OK           | -     | -            | -     |
| 961     | contaminated | low depth     | OK           | -     | -            | -     |
| 994     | -            | -             | -            | -     | -            | OK    |
| 995     | -            | -             | -            | -     | -            | OK    |
| 996     | -            | -             | -            | -     | -            | OK    |
| 998     | -            | -             | -            | -     | OK           | -     |
| 1002    | -            | -             | -            | -     | -            | OK    |
| 1043    | -            | -             | -            | OK    | -            | -     |
| 1052    | -            | -             | -            | -     | -            | OK    |
| 1053    | -            | -             | -            | -     | -            | OK    |
| 1057    | -            | -             | -            | -     | -            | OK    |
| 1398    | -            | -             | -            | -     | contaminated | -     |
| 1401    | -            | -             | -            | -     | -            | OK    |
| 1405    | -            | -             | -            | -     | -            | OK    |
| 1684    | -            | low depth     | OK           | -     | -            | -     |
| 1701    | -            | contaminated  | fragmented   | -     | -            | -     |
| 2007    | -            | contaminated  | OK           | -     | -            | -     |
| 2090    | -            | contaminated  | OK           | -     | -            | -     |
| 2656    | -            | low depth     | OK           | -     | -            | -     |
| 2777    | -            | low depth     | OK           | -     | -            | -     |
| 2855    | -            | contaminated  | -            | -     | -            | -     |
| 3247    | -            | fragmented    | OK           | -     | -            | -     |
| 3326    | -            | OK            | contaminated | -     | -            | -     |
| 4101    | -            | OK (not used) | OK           | -     | -            | -     |
| 5232    | -            | low depth     | -            | OK    | -            | -     |
| 5729    | -            | OK (not used) | OK           | -     | -            | -     |
| 6020    | -            | contaminated  | -            | -     | -            | -     |
| 6512    | -            | low depth     | low depth    | -     | -            | -     |
| 7111    | -            | low depth     | OK           | -     | -            | -     |

This table provides an overview of all WGS datasets that were generated. Datasets that passed the QC checks are marked as ‘OK’. When multiple datasets from one isolate passed all QC checks, the least fragmented (i.e., highest N50) was retained for the analysis. Datasets that passed the QC checks but that were not used afterwards are marked as ‘not used’.

**Table S4: Read-trimming statistics**

| Isolate       | Read pairs in | Read pairs after trimming | Forward only surviving | Reverse only surviving | Dropped pairs |
|---------------|---------------|---------------------------|------------------------|------------------------|---------------|
| 2019_071_3326 | 389,318       | 376,363                   | 9,451                  | 1,496                  | 2,008         |
| 2020_040_1684 | 407,374       | 386,680                   | 16,891                 | 1,743                  | 2,060         |
| 2020_040_2007 | 313,007       | 288,293                   | 21,724                 | 982                    | 2,008         |
| 2020_040_2090 | 457,715       | 423,759                   | 30,201                 | 1,321                  | 2,434         |
| 2020_040_2656 | 338,855       | 318,532                   | 17,322                 | 1,149                  | 1,852         |
| 2020_040_2777 | 321,816       | 306,014                   | 12,891                 | 1,469                  | 1,442         |
| 2020_040_32   | 434,252       | 418,745                   | 11,515                 | 2,159                  | 1,833         |
| 2020_040_3247 | 542,805       | 517,681                   | 20,798                 | 1,984                  | 2,342         |
| 2020_040_4101 | 416,700       | 393,212                   | 20,009                 | 1,477                  | 2,002         |
| 2020_040_562  | 407,244       | 382,023                   | 21,410                 | 1,541                  | 2,270         |
| 2020_040_5729 | 524,811       | 493,420                   | 26,420                 | 2,036                  | 2,935         |
| 2020_040_7111 | 318,791       | 296,238                   | 18,725                 | 2,026                  | 1,802         |
| 2020_040_905  | 252,794       | 239,684                   | 10,679                 | 944                    | 1,487         |
| 2020_040_907  | 399,918       | 381,236                   | 14,981                 | 2,037                  | 1,664         |
| 2020_040_961  | 249,510       | 232,972                   | 13,799                 | 1,128                  | 1,611         |
| 2020_041_1043 | 623,472       | 603,544                   | 14,316                 | 3,357                  | 2,255         |
| 2020_041_5232 | 505,589       | 484,350                   | 17,919                 | 1,448                  | 1,872         |
| 2020_045_998  | 377,646       | 356,546                   | 18,541                 | 938                    | 1,621         |
| 2022_017_1002 | 841,302       | 779,525                   | 51,569                 | 4,104                  | 6,104         |
| 2022_017_1052 | 798,722       | 739,538                   | 49,355                 | 3,698                  | 6,131         |
| 2022_017_1053 | 671,853       | 621,664                   | 41,517                 | 3,542                  | 5,130         |
| 2022_017_1057 | 659,337       | 621,433                   | 29,130                 | 4,694                  | 4,080         |
| 2022_017_1401 | 658,773       | 613,191                   | 36,785                 | 3,970                  | 4,827         |
| 2022_017_1405 | 769,974       | 710,812                   | 50,019                 | 3,550                  | 5,593         |
| 2022_017_994  | 797,064       | 743,059                   | 44,471                 | 4,187                  | 5,347         |
| 2022_017_995  | 849,255       | 792,694                   | 45,058                 | 5,552                  | 5,951         |
| 2022_017_996  | 829,225       | 768,673                   | 49,538                 | 4,393                  | 6,621         |

The first column lists the isolate name. The second and third columns list the number of read pairs before and after trimming, respectively. The fourth and fifth columns list the number of forward and reverse orphaned reads after trimming, respectively. The sixth column lists the number of read pairs that were dropped.

**Table S5: *De novo* assembly statistics**

| Isolate       | Nb. of contigs | Total length | N50     | Median depth |
|---------------|----------------|--------------|---------|--------------|
| 2019_071_3326 | 61             | 2,854,071    | 73,523  | 51           |
| 2020_040_1684 | 33             | 2,869,415    | 273,468 | 57           |
| 2020_040_2007 | 24             | 2,746,284    | 257,536 | 46           |
| 2020_040_2090 | 36             | 2,810,804    | 239,711 | 62           |
| 2020_040_2656 | 27             | 2,725,313    | 335,890 | 52           |
| 2020_040_2777 | 39             | 2,866,367    | 147,242 | 42           |
| 2020_040_32   | 48             | 2,865,914    | 140,837 | 53           |
| 2020_040_3247 | 30             | 2,788,144    | 257,715 | 73           |
| 2020_040_4101 | 35             | 2,850,650    | 153,642 | 58           |
| 2020_040_562  | 33             | 2,855,097    | 227,416 | 53           |
| 2020_040_5729 | 28             | 2,770,352    | 288,972 | 71           |
| 2020_040_7111 | 32             | 2,849,716    | 209,691 | 40           |
| 2020_040_905  | 38             | 2,754,061    | 153,059 | 35           |
| 2020_040_907  | 34             | 2,756,916    | 176,059 | 52           |
| 2020_040_961  | 32             | 2,901,686    | 173,257 | 32           |
| 2020_041_1043 | 41             | 2,804,121    | 128,990 | 82           |
| 2020_041_5232 | 39             | 2,884,896    | 336,748 | 67           |
| 2020_045_998  | 32             | 2,846,679    | 273,462 | 55           |
| 2022_017_1002 | 35             | 2,826,466    | 288,051 | 111          |
| 2022_017_1052 | 30             | 2,845,033    | 275,437 | 115          |
| 2022_017_1053 | 42             | 2,857,223    | 273,393 | 98           |
| 2022_017_1057 | 28             | 2,859,387    | 364,492 | 94           |
| 2022_017_1401 | 29             | 2,877,784    | 300,121 | 87           |
| 2022_017_1405 | 26             | 2,835,369    | 275,295 | 113          |
| 2022_017_994  | 23             | 2,877,542    | 326,564 | 113          |
| 2022_017_995  | 28             | 2,893,609    | 326,670 | 113          |
| 2022_017_996  | 34             | 2,887,721    | 235,828 | 115          |

The first column lists the isolate name. The second, third, and fourth column list the number of contigs, N50, and total assembly length, respectively. These metrics were calculated by QUAST. The fifth column lists the median read depth, determined by mapping the processed reads against the assembly using Bowtie2.

**Table S6: Sequence types, *spa* types, and SCC*mec* types**

| isolate       | ST  | <i>spa</i> type | SCC <i>mec</i> type     |
|---------------|-----|-----------------|-------------------------|
| 2020_040_7111 | 8   | t121            | IVa(2B)                 |
| 2020_040_961  | 8   | t121            | IVa(2B)                 |
| 2020_040_1684 | 8   | t1476           | IV(2B&5) <sup>(1)</sup> |
| 2020_040_2090 | 8   | t1476           | IV(2B&5) <sup>(1)</sup> |
| 2020_040_32   | 8   | t1476           | IV(2B&5) <sup>(1)</sup> |
| 2020_041_5232 | 8   | t1476           | IV(2B&5) <sup>(1)</sup> |
| 2020_045_998  | 8   | t1476           | IV(2B&5) <sup>(1)</sup> |
| 2022_017_1052 | 8   | t1476           | IV(2B&5) <sup>(1)</sup> |
| 2022_017_1053 | 8   | t1476           | IV(2B&5) <sup>(1)</sup> |
| 2022_017_1057 | 8   | t1476           | IV(2B&5) <sup>(1)</sup> |
| 2022_017_1401 | 8   | t1476           | IV(2B&5) <sup>(1)</sup> |
| 2022_017_1405 | 8   | t1476           | IV(2B&5) <sup>(1)</sup> |
| 2022_017_994  | 8   | t1476           | IV(2B&5) <sup>(1)</sup> |
| 2022_017_995  | 8   | t1476           | IV(2B&5) <sup>(1)</sup> |
| 2022_017_996  | 8   | t1476           | IV(2B&5) <sup>(1)</sup> |
| 2019_071_3326 | 121 | t314            | IVa(2B)                 |
| 2020_040_2777 | 121 | t314            | IVa(2B)                 |
| 2020_040_4101 | 121 | t314            | IVa(2B)                 |
| 2020_040_562  | 121 | t314            | IVa(2B)                 |
| 2020_041_1043 | 121 | t314            | IVa(2B)                 |
| 2020_040_905  | 152 | t1096           | Va(5C2)                 |
| 2020_040_907  | 152 | t1096           | Va(5C2)                 |
| 2020_040_2656 | 152 | t355            | XIII(9A) <sup>(2)</sup> |
| 2020_040_2007 | 152 | t4690           | Vc(5C2&5)               |
| 2020_040_3247 | 152 | t4690           | Vc(5C2&5)               |
| 2020_040_5729 | 772 | t657            | V(5C2)                  |
| 2022_017_1002 | 789 | t091            | V(5C2&5)                |

(1) The *ccrA2*, *dmecR1* and *CCB2* genes were missing in these isolates, and prediction was, therefore, solely based on homology to the complete SCC*mec* cassette which was covered for ~55%. (2) No match found based on homology for whole cassette, prediction was solely on genes.

This table lists the results of the WGS-based typing. The first column lists the isolate name. The second, third, and fourth columns list the sequence types, *spa* types, and SCC*mec* types, respectively.
